# Supplementary material for: Efficient double-strand cleavage of DNA mediated by Zn(ii)-based artificial nucleases
Source: Royal Society of Chemistry journal article supplement (doi:10.1039/c0dt01659d), 2011-01-01
Supplement: c0dt01659d.pdf [file c0dt01659d.pdf]

## **Supporting Information**

### **Efficient double-strand cleavage of DNA mediated by Zn(II)-based artificial nucleases**

**Jing Qian, Liping Wang, Wen Gu, Xin Liu, Jinlei Tian, Shiping Yan**

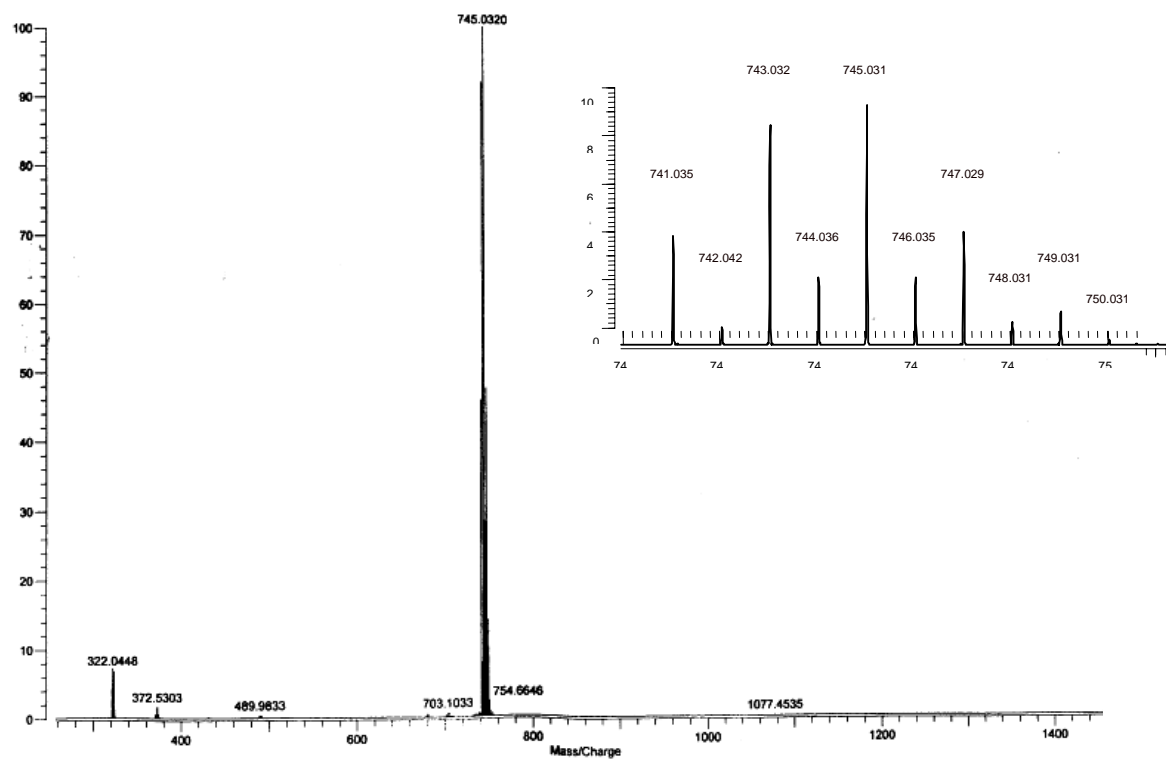

**Figure S1** Electrospray mass spectra and the isotope distribution patterns for complex **3**. Attributions: 745.032,  $[\text{Zn}_2(\text{L})_2(\text{C}_2\text{O}_4)(\text{ClO}_4)]^+$ .

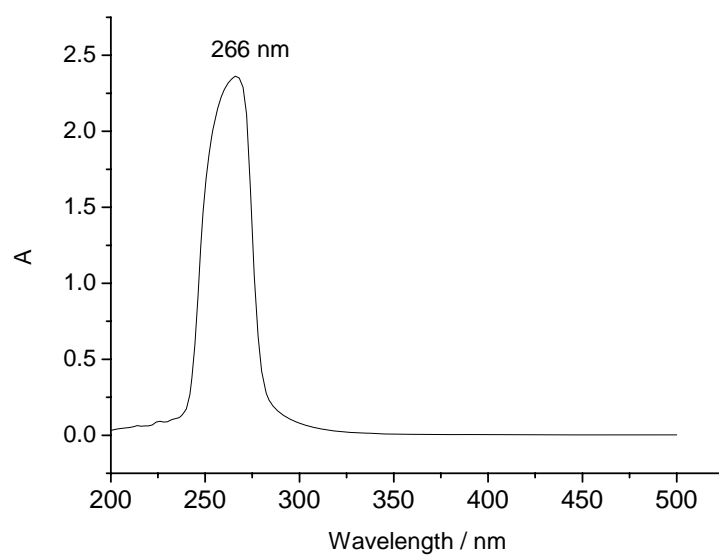

**Figure S2** UV-vis spectrum of complex **1** in H<sub>2</sub>O solution.

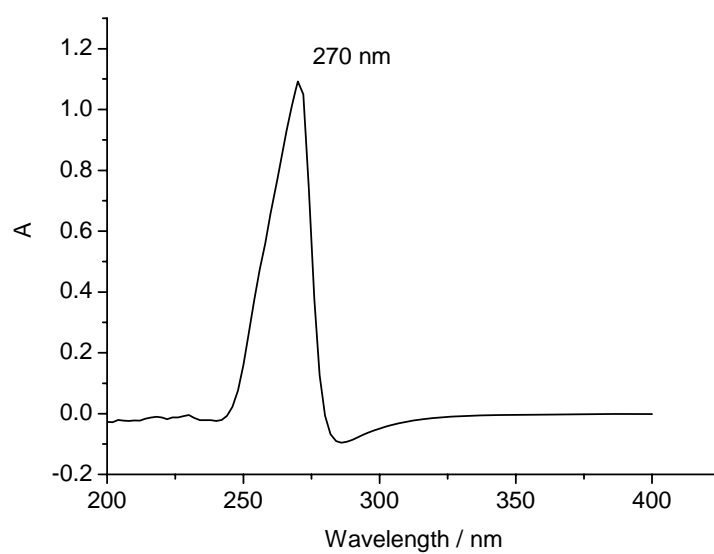

**Figure S3** UV-vis spectrum of complex **2** in H<sub>2</sub>O solution.
